# Supplementary material
Source: PubMed Central journal article supplement (PMC4074745)
Supplement: Supp_Data.pdf [file Supp_Data.pdf]

## Supplementary Data

SUPPLEMENTARY TABLE S1. *P*-VALUES FOR TWO-TAILED STUDENT'S *t*-DISTRIBUTION FOR DATA IN FIGURE 2B

|     | <i>Control</i> | <i>FB</i>     |
|-----|----------------|---------------|
| T12 | 0.4190         | <b>0.0287</b> |
| T13 | <b>0.0354</b>  | <b>0.0118</b> |
| T23 | <b>0.0063</b>  | 0.7109        |

Values correspond to *p*-values calculated for all combinations of two data points on a given plot. For example, T12 corresponds to the *p*-value comparing conditions 1 and 2. Values less than 0.05 are in bold.

FB, fibroblast.

SUPPLEMENTARY TABLE S2. *p*-VALUES FOR TWO-TAILED STUDENT'S *t*-DISTRIBUTION FOR DATA IN FIGURE 2C

|     | <i>Control</i> | <i>FB</i>     |
|-----|----------------|---------------|
| T12 | 0.2331         | <b>0.0062</b> |
| T13 | <b>0.0291</b>  | <b>0.0003</b> |
| T23 | 0.1263         | 0.8194        |

Values correspond to *p*-values calculated for all combinations of two data points on a given plot. For example, T12 corresponds to the *p*-value comparing conditions 1 and 2. Values less than 0.05 are in bold.

SUPPLEMENTARY TABLE S3. *p*-VALUES FOR TWO-TAILED STUDENT'S *t*-DISTRIBUTION FOR DATA IN FIGURE 2D

| <i>Condition</i> | <i>p-Value</i> |
|------------------|----------------|
| T12              | <b>0.0015</b>  |
| T13              | <b>0.0011</b>  |
| T14              | <b>0.0000</b>  |
| T23              | 0.1416         |
| T24              | <b>0.0289</b>  |
| T34              | 0.8157         |

Values correspond to *p*-values calculated for all combinations of two data points on a given plot. For example, T12 corresponds to the *p*-value comparing conditions 1 and 2. Values less than 0.05 are in bold.

SUPPLEMENTARY TABLE S4. *p*-VALUES FOR TWO-TAILED STUDENT'S *t*-DISTRIBUTION FOR DATA IN FIGURE 3

|     | <i>Branches</i> | <i>Length</i> | <i>% Area</i> | <i>Diameter</i> |
|-----|-----------------|---------------|---------------|-----------------|
| T12 | 0.1408          | 0.8727        | <b>0.0021</b> | <b>0.0162</b>   |
| T13 | <b>0.0409</b>   | <b>0.0091</b> | <b>0.0252</b> | <b>0.0012</b>   |
| T14 | <b>0.0000</b>   | <b>0.0018</b> | <b>0.0000</b> | <b>0.0030</b>   |
| T23 | 0.0832          | <b>0.0016</b> | <b>0.0021</b> | <b>0.0001</b>   |
| T24 | <b>0.0000</b>   | <b>0.0000</b> | <b>0.0253</b> | <b>0.0001</b>   |
| T34 | <b>0.0003</b>   | 0.1025        | <b>0.0004</b> | <b>0.0075</b>   |

Values correspond to *p*-values calculated for all combinations of two data points on a given plot. For example, T12 corresponds to the *p*-value comparing conditions 1 and 2. Values less than 0.05 are in bold.

SUPPLEMENTARY TABLE S5. *p*-VALUES FOR TWO-TAILED STUDENT'S *t*-DISTRIBUTION FOR DATA IN FIGURE 4

|     | <i>Branches</i> | <i>Length</i> | <i>% Area</i> | <i>Diameter</i> |
|-----|-----------------|---------------|---------------|-----------------|
| T12 | 0.3229          | <b>0.0361</b> | 0.9290        | 0.8614          |
| T13 | <b>0.0416</b>   | 0.0573        | 0.6942        | 0.3623          |
| T14 | <b>0.0002</b>   | <b>0.0018</b> | 0.6949        | <b>0.0064</b>   |
| T23 | 0.1433          | 0.8692        | 0.6779        | 0.2384          |
| T24 | <b>0.0012</b>   | <b>0.0323</b> | 0.6359        | <b>0.0023</b>   |
| T34 | <b>0.0132</b>   | 0.0630        | 0.8990        | <b>0.0222</b>   |

Values correspond to *p*-values calculated for all combinations of two data points on a given plot. For example, T12 corresponds to the *p*-value comparing conditions 1 and 2. Values less than 0.05 are in bold.

SUPPLEMENTARY TABLE S6. *p*-VALUES FOR TWO-TAILED STUDENT'S *t*-DISTRIBUTION FOR DATA IN FIGURE 5

|     | <i>Branches</i> | <i>Length</i> | <i>% Area</i> | <i>Diameter</i> |
|-----|-----------------|---------------|---------------|-----------------|
| T12 | 0.9269          | 0.1447        | <b>0.0819</b> | <b>0.0508</b>   |
| T13 | 0.2423          | <b>0.0005</b> | <b>0.0019</b> | <b>0.0001</b>   |
| T23 | 0.2918          | 0.1222        | <b>0.0031</b> | <b>0.0010</b>   |

Values correspond to *p*-values calculated for all combinations of two data points on a given plot. For example, T12 corresponds to the *p*-value comparing conditions 1 and 2. Values less than 0.05 are in bold.
